# Supplementary material
Source: PubMed Central journal article supplement (PMC3102379)
Supplement: 1100815108_pnas.201100815SI.pdf [file 1100815108_pnas.201100815SI.pdf]

# Supporting Information

Li et al. 10.1073/pnas.1100815108

**Table S1. Lamina-specific responses of neurons to forepaw electrical stimulation**

|                                                          | Control              |          |                        |          | Denervated           |          |                        |          |
|----------------------------------------------------------|----------------------|----------|------------------------|----------|----------------------|----------|------------------------|----------|
|                                                          | S1 ipsilateral to FP |          | S1 contralateral to FP |          | S1 ipsilateral to FP |          | S1 contralateral to FP |          |
|                                                          | AP < 0.5             | AP > 0.5 | AP < 0.5               | AP > 0.5 | AP < 0.5             | AP > 0.5 | AP < 0.5               | AP > 0.5 |
| Neurons responding to forepaw electrical stimulation (%) |                      |          |                        |          |                      |          |                        |          |
| III                                                      | 0                    | 0        | 0                      | 0        | 0                    | 0        | 0                      | 2        |
| IV                                                       | 0                    | 0        | 0                      | 11       | 6                    | 4        | 4                      | 19       |
| V + VI                                                   | 0                    | 4        | 0                      | 68       | 19                   | 15       | 4                      | 42       |
| Sum of responded neurons (%)                             | 4                    |          | 79                     |          | 43                   |          | 71                     |          |
| Number of isolated neurons                               | 25                   |          | 28                     |          | 54                   |          | 48                     |          |

The percentage of the population of neurons exhibiting short action potential (AP; AP < 0.5 ms) and long AP (AP > 0.5 ms) durations in different laminae responding to intact forepaw (FP) electrical stimulation is shown for control and denervated rats in primary somatosensory cortex (S1).

**Table S2. Lamina-specific responses of neurons to illumination of eNpHR**

|                                           | Control              |          |                        |          | Denervated           |          |                        |          |
|-------------------------------------------|----------------------|----------|------------------------|----------|----------------------|----------|------------------------|----------|
|                                           | S1 ipsilateral to FP |          | S1 contralateral to FP |          | S1 ipsilateral to FP |          | S1 contralateral to FP |          |
|                                           | AP < 0.5             | AP > 0.5 | AP < 0.5               | AP > 0.5 | AP < 0.5             | AP > 0.5 | AP < 0.5               | AP > 0.5 |
| Neurons showing decreased firing rate (%) |                      |          |                        |          |                      |          |                        |          |
| III                                       | 0                    | 4        | 0                      | 0        | 0                    | 1.85     | 0                      | 0        |
| IV                                        | 0                    | 8        | 0                      | 7.14     | 5.56                 | 1.85     | 4.17                   | 12.50    |
| V + VI                                    | 4                    | 4        | 0                      | 17.86    | 3.70                 | 1.85     | 4.17                   | 33.33    |
| Neurons showing increased firing rate (%) |                      |          |                        |          |                      |          |                        |          |
| III                                       | 0                    | 4        | 0                      | 0        | 3.70                 | 3.70     | 0                      | 0        |
| IV                                        | 16                   | 0        | 0                      | 3.57     | 7.41                 | 11.11    | 0                      | 6.25     |
| V + VI                                    | 4                    | 44       | 0                      | 21.43    | 24.07                | 24.07    | 2.08                   | 16.67    |

The percentage of the population of neurons exhibiting short (AP < 0.5 ms) and long (AP > 0.5 ms) AP durations in different laminae increasing and decreasing their firing rate in response to illumination of halorhodopsin (eNpHR) over the right primary somatosensory cortex (S1) is shown for control and denervated rats in S1.

**Table S3. Lamina-specific average changes of neuronal firing rates to illumination of eNpHR**

|        | Control              |        |          |        |                        |   |          |        | Denervated           |        |          |        |                        |        |          |        |
|--------|----------------------|--------|----------|--------|------------------------|---|----------|--------|----------------------|--------|----------|--------|------------------------|--------|----------|--------|
|        | S1 ipsilateral to FP |        |          |        | S1 contralateral to FP |   |          |        | S1 ipsilateral to FP |        |          |        | S1 contralateral to FP |        |          |        |
|        | AP < 0.5             |        | AP > 0.5 |        | AP < 0.5               |   | AP > 0.5 |        | AP < 0.5             |        | AP > 0.5 |        | AP < 0.5               |        | AP > 0.5 |        |
|        | Hz                   | %      | Hz       | %      | Hz                     | % | Hz       | %      | Hz                   | %      | Hz       | %      | Hz                     | %      | Hz       | %      |
| III    | —                    | —      | 0.80     | -48.15 | —                      | — | —        | —      | 0.85                 | 0      | 6.37     | -12.22 | —                      | —      | —        | —      |
| IV     | 1.29                 | 0      | 0.40     | -37.50 | —                      | — | 0.76     | -40.00 | 1.32                 | -44.35 | 2.17     | -43.18 | 1.68                   | -21.08 | 4.87     | -26.58 |
| V + VI | 0.63                 | -20.00 | 2.70     | -33.33 | —                      | — | 4.41     | -20.06 | 2.41                 | -27.85 | 4.44     | 0      | 1.05                   | -30.29 | 6.01     | -30.84 |
| III    | —                    | —      | 0.80     | 19.05  | —                      | — | —        | —      | 0.85                 | 168.64 | 6.37     | 52.70  | —                      | —      | —        | —      |
| IV     | 1.29                 | 185.68 | 0.40     | —      | —                      | — | 0.76     | 3.41   | 1.32                 | 76.71  | 2.17     | 192.05 | 1.68                   | 0      | 4.87     | 48.67  |
| V + VI | 0.63                 | 125.00 | 2.70     | 167.30 | —                      | — | 4.41     | 30.40  | 2.41                 | 149.25 | 4.44     | 113.95 | 1.05                   | 130.77 | 6.01     | 24.32  |

The average percentages of increases and decreases in firing rates (%) of neurons exhibiting short (AP < 0.5 ms) and long (AP > 0.5 ms) AP durations in different laminae induced by 30 s of illumination of eNpHR over the right primary somatosensory cortex (S1) were compared with 30 s of spontaneous firing rates (Hz) for control and denervated rats.

**Table S4. Lamina-specific average changes of neuronal firing rates to illumination of eNpHR in conjunction with forepaw electrical stimulation**

|        | Control              |        |          |        |                        |   |          |        | Denervated           |        |          |        |                        |        |          |        |
|--------|----------------------|--------|----------|--------|------------------------|---|----------|--------|----------------------|--------|----------|--------|------------------------|--------|----------|--------|
|        | S1 ipsilateral to FP |        |          |        | S1 contralateral to FP |   |          |        | S1 ipsilateral to FP |        |          |        | S1 contralateral to FP |        |          |        |
|        | AP < 0.5             |        | AP > 0.5 |        | AP < 0.5               |   | AP > 0.5 |        | AP < 0.5             |        | AP > 0.5 |        | AP < 0.5               |        | AP > 0.5 |        |
|        | Hz                   | %      | Hz       | %      | Hz                     | % | Hz       | %      | Hz                   | %      | Hz       | %      | Hz                     | %      | Hz       | %      |
| III    | —                    | —      | 1.20     | -39.47 | —                      | — | —        | —      | 1.17                 | -24.19 | 5.04     | -13.10 | —                      | —      | 1.48     | 0      |
| IV     | 2.36                 | -15.18 | 0.5      | -50    | —                      | — | 1.24     | -13.03 | 1.4                  | -60.99 | 3.19     | -50.32 | 2.3                    | -3.64  | 4.24     | -6.25  |
| V + VI | 1.62                 | -93.44 | 3.17     | -53.69 | —                      | — | 5.34     | -32.69 | 4.43                 | -18.62 | 4.72     | -7.09  | 1.75                   | -28.19 | 6.12     | -21.17 |
| III    | —                    | —      | 1.20     | 11.76  | —                      | — | —        | —      | 1.17                 | 125    | 5.04     | 65.22  | —                      | —      | 1.48     | 0      |
| IV     | 2.36                 | 227.50 | 0.5      | 0      | —                      | — | 1.24     | 24.11  | 1.4                  | 63.57  | 3.19     | 64.62  | 2.3                    | 8.43   | 4.24     | 27.14  |
| V + VI | 1.62                 | 55.56  | 3.17     | 85.42  | —                      | — | 5.34     | 13.64  | 4.43                 | 58.33  | 4.72     | 68.68  | 1.75                   | 38.71  | 6.12     | 49.13  |

The average percentages of increases and decreases in firing rates (%) of neurons exhibiting short (AP < 0.5 ms) and long (AP > 0.5 ms) AP durations in different laminae induced by 30 s of intact forepaw (FP) electrical stimulation combined with illumination of eNpHR over the right primary somatosensory cortex (S1) were compared with the firing rates (Hz) induced by 30 s of intact FP electrical stimulation for control and denervated rats.

**Table S5. Cortical depth-specific average changes of the current source density sink and source values induced by illumination of eNpHR in conjunction with forepaw electrical stimulation**

| Depth (μm) | Control S1 ipsilateral to FP |               |              |               | Denervated S1 ipsilateral to FP |              |              |              |
|------------|------------------------------|---------------|--------------|---------------|---------------------------------|--------------|--------------|--------------|
|            | Light off                    |               | Light on     |               | Light off                       |              | Light on     |              |
|            | Sink (%)                     | Source (%)    | Sink (%)     | Source (%)    | Sink (%)                        | Source (%)   | Sink (%)     | Source (%)   |
| 300        | —                            | —             | —            | —             | 5.90 ± 3.31                     | 11.59 ± 2.88 | 8.39 ± 2.58  | 16.22 ± 2.78 |
| 450        | 7.09 ± 2.42                  | 19.50         | —            | —             | 9.31 ± 5.08                     | 10.12        | 11.28 ± 3.08 | 15.09 ± 3.91 |
| 600        | 13.27                        | 40.79 ± 17.03 | —            | 4.44          | 6.68 ± 0.53                     | 11.84 ± 1.49 | 19.70 ± 7.47 | 7.88 ± 3.46  |
| 750        | 7.94 ± 1.53                  | —             | 16.88        | 10.56 ± 1.44  | 7.46 ± 2.12                     | 13.12 ± 3.94 | 10.73 ± 0.90 | 8.67 ± 2.15  |
| 900        | 15.26                        | 28.63         | 10.69 ± 1.74 | 22.56 ± 10.18 | 14.27 ± 7.18                    | 10.95 ± 1.35 | 14.19 ± 2.34 | 8.16 ± 2.56  |
| 1,050      | 9.14 ± 3.22                  | 10.13 ± 3.77  | 10.34 ± 2.24 | 11.48         | 10.99 ± 2.32                    | 31.97        | 10.13 ± 4.13 | 10.40 ± 4.58 |
| 1,200      | 7.54 ± 3.36                  | 13.04         | 10.55 ± 4.03 | 12.13 ± 4.12  | 12.74 ± 1.16                    | 24.29 ± 7.15 | 11.14 ± 0.71 | 16.66 ± 4.59 |
| 1,350      | 12.24 ± 1.06                 | 16.19 ± 3.27  | 9.38 ± 6.32  | 12.85         | 15.16 ± 5.67                    | 7.65 ± 3.06  | 12.77 ± 3.25 | 10.36 ± 4.48 |
| 1,500      | 20.84 ± 4.45                 | 8.75 ± 1.08   | 13.58 ± 2.82 | 11.82 ± 2.27  | 13.80 ± 6.92                    | 16.04 ± 7.60 | 5.68 ± 0.87  | 8.37 ± 3.03  |
| 1,650      | 9.12 ± 0.41                  | 13.42 ± 0.23  | 12.69 ± 2.63 | 12.77 ± 8.50  | 10.52 ± 3.48                    | 11.70 ± 1.89 | 8.93 ± 3.40  | 7.64 ± 3.76  |
| 1,800      | 12.24 ± 5.99                 | 12.12 ± 7.61  | 6.36         | 23.56         | 8.90                            | 7.99 ± 2.79  | 12.20 ± 2.83 | 9.91 ± 2.73  |

The average percentages of the current source density values (± SEM) are shown for control and denervated rats in primary somatosensory cortex (S1) ipsilateral to intact forepaw electrical stimulation with (light on) or without illumination (light off) of eNpHR over the right healthy S1. Only significant changes in the sink and source amplitude (Z test analysis with effective significance of  $P < 0.05$ ) are shown.
